# Supplementary material for: PBRM1 mutation and preliminary response to immune checkpoint blockade treatment in non-small cell lung cancer
Source: PubMed Central journal article supplement (PMC7075870; doi:10.1038/s41698-020-0112-3), 2020-03-16
Supplement: 41698_2020_112_MOESM2_ESM.pdf [file 41698_2020_112_MOESM2_ESM.pdf]

# ***PBRM1* mutation and preliminary response to immune checkpoint blockade treatment in non-small cell lung cancer**

## **Supplementary Information**

**Supplementary Figure 1.** The workflow of this study.

**Supplementary Figure 2.** The *PBRM1* mutation landscape of Non-small cell lung cancer (NSCLC, 2767 patients in our study) and clear cell renal carcinoma (ccRCC, 402 patients from TCGA).

**Supplementary Table 1.** The *PBRM1* variants within our study cohort (81 mutation and 9 homozygous deletion among 84 *PBRM1* mutated patients).

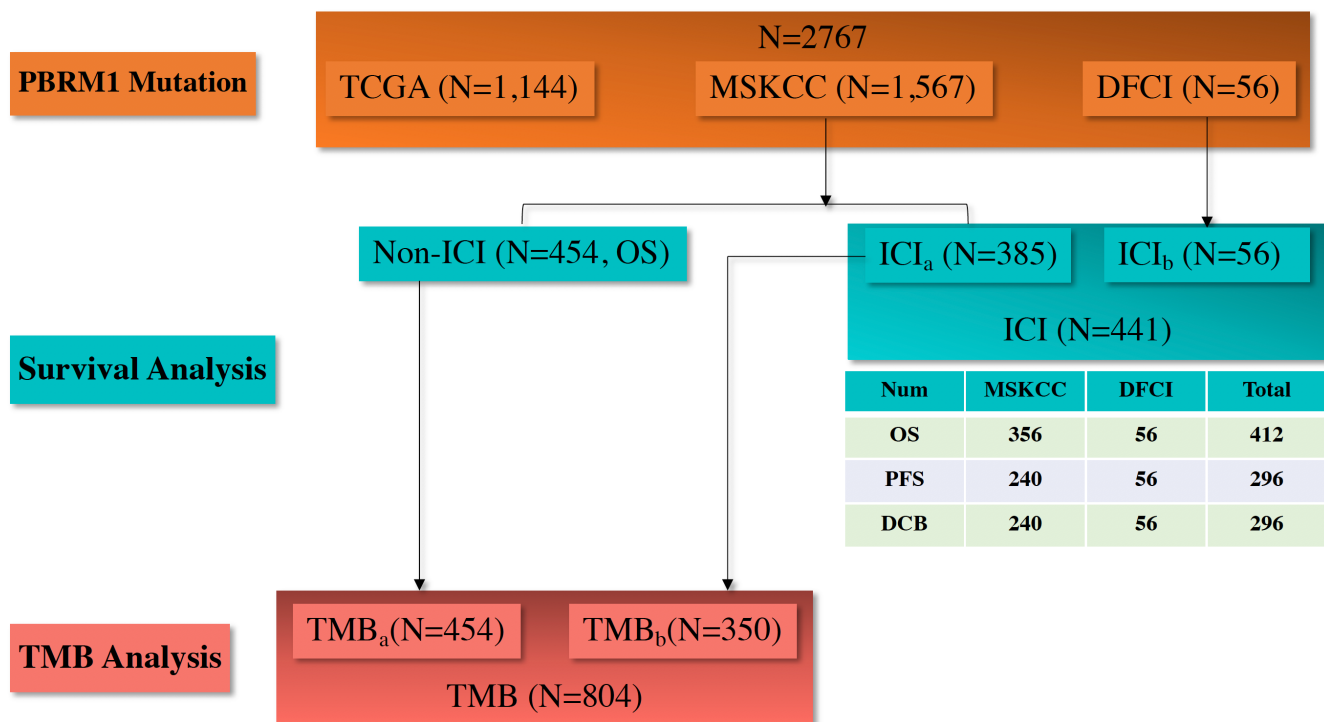

**Supplementary Figure 1. The workflow of this study.**

1) *PBRM1* mutation: the prevalence of *PBRM1* mutation in the combined NSCLC cohort of 2767 patients, from 3 sources: (1) The Cancer Genome Atlas (TCGA) (N=1144), (2) Memorial Sloan Kettering Cancer Center (MSKCC) (N=1567), and (3) Dana Farber Cancer Institute (DFCI) (N=56). 2) Survival analysis: A subset of ICB-treated patients (N=441, 385 from MSKCC, 56 from DFCI) and 454 non-ICB treated patients with annotated clinical records were further analyzed for association between *PBRM1* mutation and response to ICB therapy. 3) TMB analysis: we investigated the relationship between TMB and *PBRM1* mutation status (804 available patients from MSKCC, 454 non-ICB; 350 ICB). ICB, immune checkpoint blockade. TMB, Tumor mutation burden.

NSCLC (N=2767)

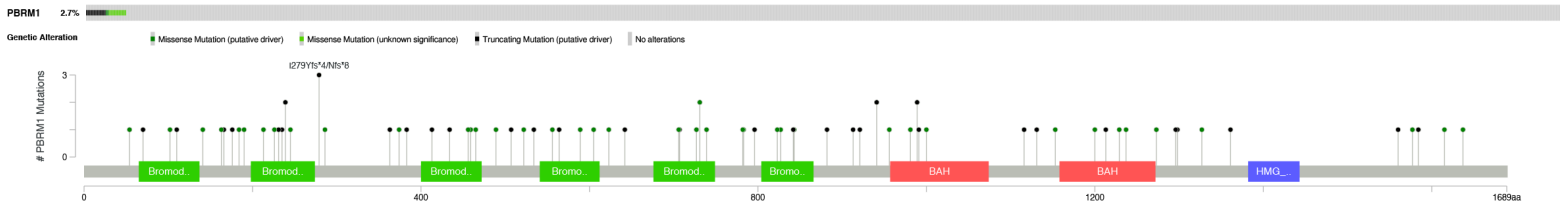

ccRCC TCGA (N=402)

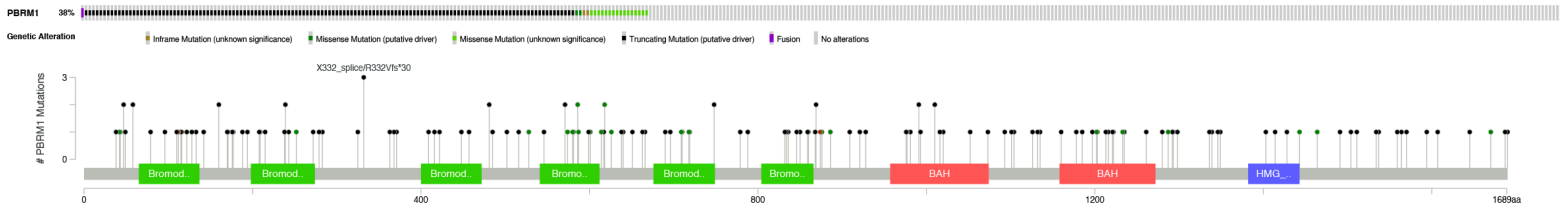

NSCLC

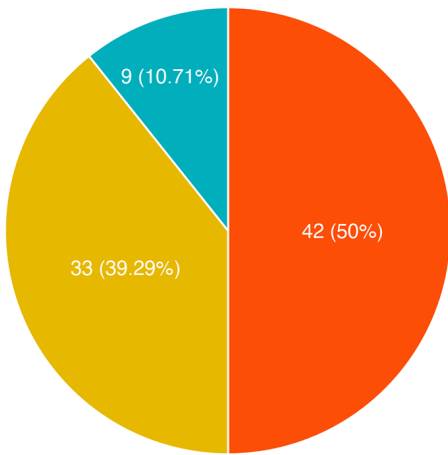

ccRCC

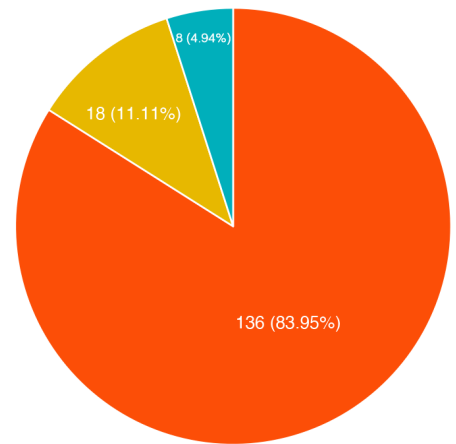

PBRM1 Mutation    Truncating Mutation    Homozygous Loss    non-LOF

**Supplementary Figure 2. The *PBRM1* mutation landscape of Non-small cell lung cancer (NSCLC, 2767 patients in our study) and clear cell renal carcinoma (ccRCC, 402 patients from TCGA).**

NSCLC seem to follow a different *PBRM1* mutation pattern with ccRCC. The prevalence of *PBRM1* mutation (NSCLC: 84/2767, 3.04%; ccRCC: 162/402, 40.30% in TCGA) and the proportion of truncating mutation (NSCLC: 51/84, 60.17%; ccRCC: 144/162, 93.51% in TCGA) were relatively low in NSCLC.

**Supplementary Table 1. The PBRM1 variants within our study cohort  
(81 mutation among 75 PBRM1 mutated patients)**

| Cohort | Sample ID         | Protein Change | Mutation Type     | Start Pos | End Pos  | Ref      | Var      | Allele Freq (T) |
|--------|-------------------|----------------|-------------------|-----------|----------|----------|----------|-----------------|
| MSKCC  | P-0000168-T01-IM3 | X239_splice    | Splice_Site       | 52682459  | 52682459 | C        | G        | 0.06            |
| MSKCC  | P-0000491-T01-IM3 | X434_splice    | Splice_Site       | 52668617  | 52668617 | C        | G        | 0.3             |
| MSKCC  | P-0000626-T01-IM3 | R534*          | Nonsense_Mutation | 52651496  | 52651496 | G        | A        | 0.1             |
| MSKCC  | P-0000671-T01-IM3 | E796*          | Nonsense_Mutation | 52643510  | 52643510 | C        | A        | 0.61            |
| MSKCC  | P-0000671-T01-IM3 | E1327K         | Missense_Mutation | 52597406  | 52597406 | C        | T        | 0.6             |
| MSKCC  | P-0000676-T01-IM3 | P556S          | Missense_Mutation | 52651430  | 52651430 | G        | A        | 0.37            |
| MSKCC  | P-0000676-T01-IM3 | S605F          | Missense_Mutation | 52651282  | 52651282 | G        | A        | 0.37            |
| MSKCC  | P-0000825-T01-IM3 | S413*          | Nonsense_Mutation | 52668681  | 52668681 | G        | C        | 0.25            |
| MSKCC  | P-0001130-T01-IM3 | G508Lfs*14     | Frame_Shift_Ins   | 52661309  | 52661310 | -        | GTATCAGT | 0.23            |
| MSKCC  | P-0001189-T01-IM3 | E842*          | Nonsense_Mutation | 52643372  | 52643372 | C        | A        | 0.85            |
| MSKCC  | P-0001283-T01-IM3 | E1200K         | Missense_Mutation | 52610650  | 52610650 | C        | T        | 0.07            |
| MSKCC  | P-0001365-T02-IM3 | L190P          | Missense_Mutation | 52692291  | 52692291 | A        | G        | 0.06            |
| MSKCC  | P-0001550-T01-IM3 | D163V          | Missense_Mutation | 52696189  | 52696189 | T        | A        | 0.15            |
| MSKCC  | P-0002016-T01-IM3 | S213C          | Missense_Mutation | 52692222  | 52692222 | G        | C        | 0.12            |
| MSKCC  | P-0002085-T01-IM3 | N110lfs*3      | Frame_Shift_Del   | 52702569  | 52702569 | T        | -        | 0.21            |
| MSKCC  | P-0002085-T02-IM5 | N110lfs*3      | Frame_Shift_Del   | 52702569  | 52702569 | T        | -        | 0.4             |
| MSKCC  | P-0002444-T01-IM3 | H843L          | Missense_Mutation | 52643368  | 52643368 | T        | A        | 0.17            |
| MSKCC  | P-0002605-T01-IM3 | X642_splice    | Splice_Site       | 52643972  | 52643972 | C        | A        | 0.18            |
| MSKCC  | P-0002709-T01-IM3 | S383*          | Nonsense_Mutation | 52668771  | 52668771 | G        | C        | 0.65            |
| MSKCC  | P-0003425-T01-IM5 | Q1298*         | Nonsense_Mutation | 52597493  | 52597493 | G        | A        | 0.06            |
| MSKCC  | P-0004124-T01-IM5 | E1132Rfs*11    | Frame_Shift_Ins   | 52613209  | 52613210 | -        | T        | 0.08            |
| MSKCC  | P-0004189-T01-IM5 | Q167Kfs*7      | Frame_Shift_Del   | 52696179  | 52696179 | C        | -        | 0.22            |
| MSKCC  | P-0004315-T01-IM5 | I279Yfs*4      | Frame_Shift_Del   | 52678784  | 52678784 | T        | -        | 0.32            |
| MSKCC  | P-0004710-T01-IM5 | X363_splice    | Splice_Site       | 52675969  | 52675969 | C        | A        | 0.09            |
| MSKCC  | P-0004802-T01-IM5 | Y1153C         | Missense_Mutation | 52613145  | 52613145 | T        | C        | 0.09            |
| MSKCC  | P-0005492-T01-IM5 | Y54C           | Missense_Mutation | 52712591  | 52712591 | T        | C        | 0.43            |
| MSKCC  | P-0005621-T02-IM5 | N882Kfs*19     | Frame_Shift_Ins   | 52637670  | 52637671 | -        | T        | 0.12            |
| MSKCC  | P-0005850-T01-IM5 | K102E          | Missense_Mutation | 52702594  | 52702594 | T        | C        | 0.33            |
| MSKCC  | P-0005897-T02-IM5 | E70Hfs*2       | Frame_Shift_Del   | 52712537  | 52712544 | AAGAGCTC | -        | 0.41            |

|       |                             |             |                   |          |          |      |   |      |
|-------|-----------------------------|-------------|-------------------|----------|----------|------|---|------|
| MSKCC | P-0005975-T01-IM5           | I279Nfs*8   | Frame_Shift_Ins   | 52678783 | 52678784 | -    | T | 0.17 |
| MSKCC | P-0007026-T01-IM5           | E374Q       | Missense_Mutation | 52668799 | 52668799 | C    | G | 0.06 |
| MSKCC | P-0007525-T01-IM5           | P1297Rfs*15 | Frame_Shift_Del   | 52597494 | 52597497 | AGGA | - | 0.05 |
| MSKCC | P-0008046-T01-IM5           | W141L       | Missense_Mutation | 52696255 | 52696255 | C    | A | 0.07 |
| MSKCC | P-0008848-T01-IM5           | E1615Q      | Missense_Mutation | 52584491 | 52584491 | C    | G | 0.35 |
| MSKCC | P-0008863-T01-IM5           | T232Pfs*21  | Frame_Shift_Del   | 52685779 | 52685779 | C    | - | 0.16 |
| MSKCC | P-0008874-T01-IM5           | M731L       | Missense_Mutation | 52643705 | 52643705 | T    | A | 0.07 |
| MSKCC | P-0008874-T01-IM5           | D727E       | Missense_Mutation | 52643715 | 52643715 | G    | C | 0.06 |
| MSKCC | P-0009196-T01-IM5           | H783Y       | Missense_Mutation | 52643549 | 52643549 | G    | A | 0.08 |
| MSKCC | P-0009295-T01-IM5           | E913*       | Nonsense_Mutation | 52637579 | 52637579 | C    | A | 0.61 |
| MSKCC | P-0009638-T01-IM5           | M706I       | Missense_Mutation | 52643778 | 52643778 | C    | A | 0.07 |
| MSKCC | P-0010181-T01-IM5           | E286K       | Missense_Mutation | 52678763 | 52678763 | C    | T | 0.12 |
| MSKCC | P-0010337-T01-IM5           | K827N       | Missense_Mutation | 52643415 | 52643415 | C    | G | 0.15 |
| MSKCC | P-0010519-T01-IM5           | R921*       | Nonsense_Mutation | 52637555 | 52637555 | G    | A | 0.21 |
| MSKCC | P-0010561-T01-IM5           | E1214Rfs*6  | Frame_Shift_Ins   | 52610608 | 52610609 | -    | T | 0.2  |
| MSKCC | P-0010561-T01-IM5           | P1584Rfs*31 | Frame_Shift_Del   | 52584582 | 52584583 | AG   | - | 0.22 |
| MSKCC | P-0011242-T01-IM5           | X239_splice | Splice_Site       | 52682459 | 52682459 | C    | T | 0.13 |
| MSKCC | P-0011260-T01-IM5           | Q235Rfs*18  | Frame_Shift_Del   | 52685769 | 52685769 | G    | - | 0.42 |
| MSKCC | P-0012001-T01-IM5           | D589N       | Missense_Mutation | 52651331 | 52651331 | C    | T | 0.11 |
| TCGA  | LUAD-CHTN-MAD06-00490-Tumor | G1273A      | Missense_Mutation | 52598123 | 52598123 | C    | G | 0.08 |
| TCGA  | LUAD-E00443-Tumor           | P465S       | Missense_Mutation | 52662960 | 52662960 | G    | A | 0.06 |
| TCGA  | LUAD-RT-S01702-Tumor        | I279Yfs*4   | Frame_Shift_Del   | 52678784 | 52678784 | T    | - | 0.44 |
| TCGA  | LUAD-RT-S01813-Tumor        | A459G       | Missense_Mutation | 52662977 | 52662977 | G    | C | 0.14 |
| TCGA  | LUAD-S01381-Tumor           | I782L       | Missense_Mutation | 52643552 | 52643552 | T    | G | 0.22 |
| TCGA  | LUAD-S01478-Tumor           | S1116*      | Nonsense_Mutation | 52620481 | 52620481 | G    | C | 0.47 |
| TCGA  | LUAD-TJW61-Tumor            | R489S       | Missense_Mutation | 52661363 | 52661363 | C    | G | 0.08 |
| TCGA  | TCGA-05-4382-01             | N739S       | Missense_Mutation | 52643680 | 52643680 | T    | C | 0.27 |
| TCGA  | TCGA-18-3417-01             | X989_splice | Splice_Site       | 52621527 | 52621527 | C    | T | 0.53 |
| TCGA  | TCGA-18-3417-01             | E226Q       | Missense_Mutation | 52685796 | 52685796 | C    | G | 0.48 |
| TCGA  | TCGA-21-1079-01             | S956R       | Missense_Mutation | 52623183 | 52623183 | G    | T | 0.33 |
| TCGA  | TCGA-38-4629-01             | R522L       | Missense_Mutation | 52651531 | 52651531 | C    | A | 0.33 |

|      |                                              |              |                   |          |          |   |   |      |
|------|----------------------------------------------|--------------|-------------------|----------|----------|---|---|------|
| TCGA | TCGA-39-5024-01                              | I245F        | Missense_Mutation | 52682440 | 52682440 | T | A | 0.19 |
| TCGA | TCGA-39-5031-01                              | E184D        | Missense_Mutation | 52692308 | 52692308 | C | G | 0.11 |
| TCGA | TCGA-44-6776-01                              | M731K        | Missense_Mutation | 52643704 | 52643704 | A | T | 0.06 |
| TCGA | TCGA-44-7659-01                              | X1560_splice | Splice_Site       | 52584762 | 52584762 | C | A | 0.45 |
| TCGA | TCGA-55-7907-01                              | S941*        | Nonsense_Mutation | 52623229 | 52623229 | G | C | 0.42 |
| TCGA | TCGA-56-8622-01                              | E707*        | Nonsense_Mutation | 52643777 | 52643777 | C | A | 0.27 |
| TCGA | TCGA-60-2698-01                              | D823H        | Missense_Mutation | 52643429 | 52643429 | C | G | 0.33 |
| TCGA | TCGA-60-2703-01                              | I1229V       | Missense_Mutation | 52610563 | 52610563 | T | C | 0.3  |
| TCGA | TCGA-63-5131-01                              | D1637N       | Missense_Mutation | 52582240 | 52582240 | C | T | 0.04 |
| TCGA | TCGA-66-2754-01                              | X989_splice  | Splice_Site       | 52623085 | 52623085 | C | G | 0.41 |
| TCGA | TCGA-66-2782-01                              | F456S        | Missense_Mutation | 52662986 | 52662986 | A | G | 0.29 |
| TCGA | TCGA-67-3770-01                              | G1577C       | Missense_Mutation | 52584605 | 52584605 | C | A | 0.22 |
| TCGA | TCGA-85-6561-01                              | R1000G       | Missense_Mutation | 52621494 | 52621494 | G | C | 0.07 |
| TCGA | TCGA-85-8479-01                              | W992Mfs*12   | Frame_Shift_Ins   | 52621518 | 52621519 | - | T | 0.43 |
| TCGA | TCGA-86-6851-01                              | K623R        | Missense_Mutation | 52649423 | 52649423 | T | C | 0.26 |
| TCGA | TCGA-86-8672-01                              | S941*        | Nonsense_Mutation | 52623229 | 52623229 | G | C | 0.42 |
| TCGA | TCGA-94-8491-01                              | P1361Hfs*23  | Frame_Shift_Del   | 52597303 | 52597303 | G | - | 0.3  |
| TCGA | TCGA-NJ-A55R-01                              | E981Q        | Missense_Mutation | 52623110 | 52623110 | C | G | 0.06 |
| DFCI | M4945                                        | X176_splice  | Splice_Site       | 52696148 | 52696148 | C | A | 0.32 |
| DFCI | SU2C_Lung-SU2C-DFCI-LUAD-1017-Tumor-SM-AOL99 | E564*        | Nonsense_Mutation | 52651406 | 52651406 | C | A | 0.52 |
| DFCI | MA7027                                       | S1237L       | Missense_Mutation | 52598231 | 52598231 | G | A | 0.37 |

**(9 patients with PBRM1 homozygous deletion)**

| <b>Cohort</b> | <b>Sample ID</b>  | <b>Copy-number Alterations</b> |
|---------------|-------------------|--------------------------------|
| MSKCC         | P-0001165-T01-IM3 | HOMDEL                         |
| MSKCC         | P-0003460-T01-IM5 | HOMDEL                         |
| MSKCC         | P-0008406-T01-IM5 | HOMDEL                         |
| TCGA          | LUAD-S01473-Tumor | HOMDEL                         |
| TCGA          | TCGA-33-6737-01   | HOMDEL                         |
| TCGA          | TCGA-39-5034-01   | HOMDEL                         |
| TCGA          | TCGA-60-2695-01   | HOMDEL                         |
| TCGA          | TCGA-85-A510-01   | HOMDEL                         |
| TCGA          | TCGA-52-7809-01   | HOMDEL                         |
